# Supplementary material for: Adjusting phase transition of titania-based nanotubes via hydrothermal and post treatment
Source: Royal Society of Chemistry journal article supplement (doi:10.1039/c5ra17692a), 2015-01-01
Supplement: c5ra17692a1.pdf [file c5ra17692a1.pdf]

## Adjusting phase transition of titania-based nanotubes via hydrothermal and post treatment

Haiqiang Lu<sup>\*a</sup>, Ying Wang<sup>a</sup>, Yuanyang Wang<sup>a</sup>, Wensheng Liang<sup>a</sup>, Jianfeng Yao<sup>\*b</sup>

<sup>a</sup>School of Chemical and Biological Engineering, Taiyuan University of Science and Technology, Taiyuan 030024, China. E-mail: luhaiqiang-1900@163.com

<sup>b</sup>College of Chemical Engineering, Nanjing Forestry University, Nanjing 210037, China. E-mail: jfyao@njfu.edu.cn

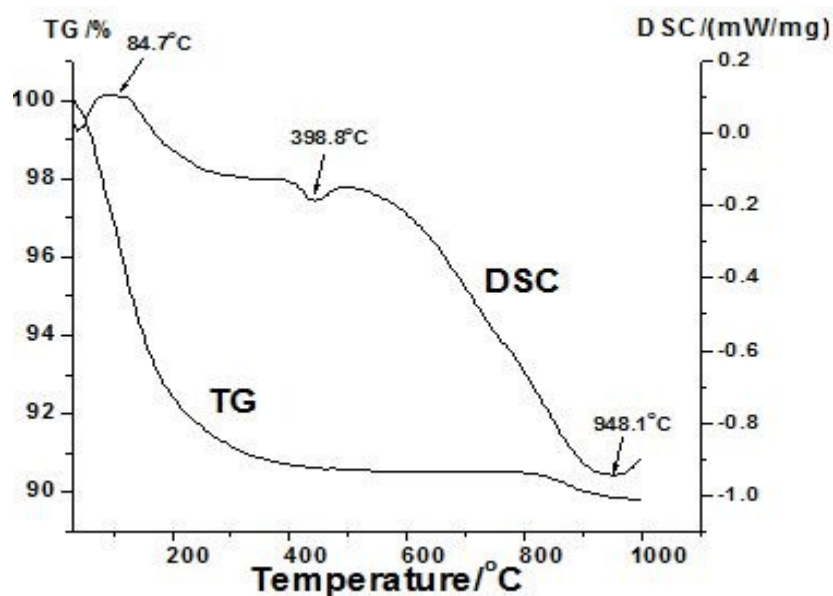

Fig. S1 TG-DSC curves of titanate nanotubes by hydrothermal treatment using P25 as raw material at 130 °C for 24 h

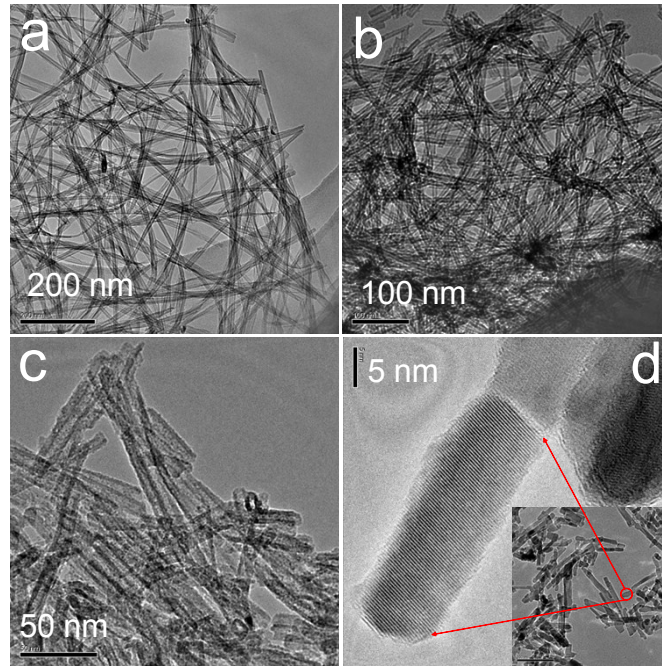

Fig. S2 TEM images of hydrogen titanate nanotubes by hydrothermal treatment using P25 as the starting material at 130 °C for 24 h and washed with deionized water (a), then calcined at different temperatures: (b) 350 °C for 5 h, (c) 400 °C for 5 h, (d) 500 °C for 5 h.

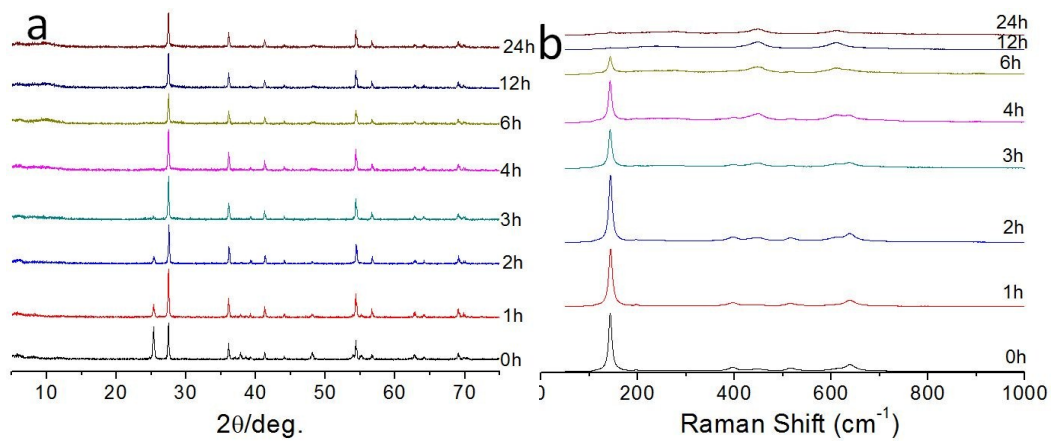

Fig. S3 XRD patterns (a) and Raman spectra (b) of hydrothermal products using P25-700-1 as a material synthesized at 130 °C for different time.

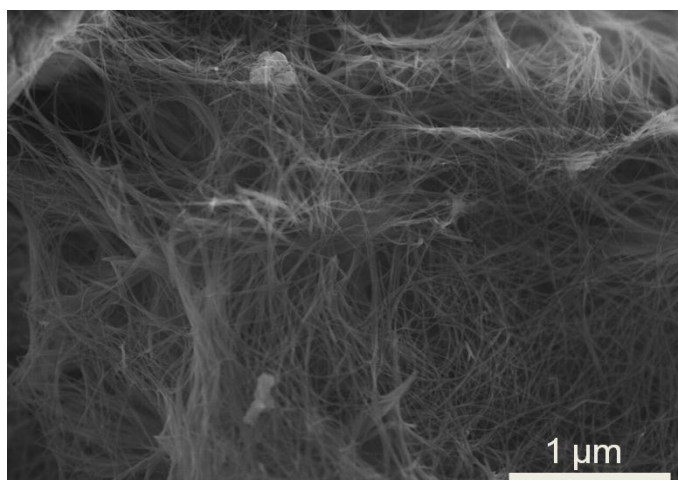

Figure S4 SEM image of the hydrothermal product using P25-800-8 as the starting material at 130 °C for 24 h.

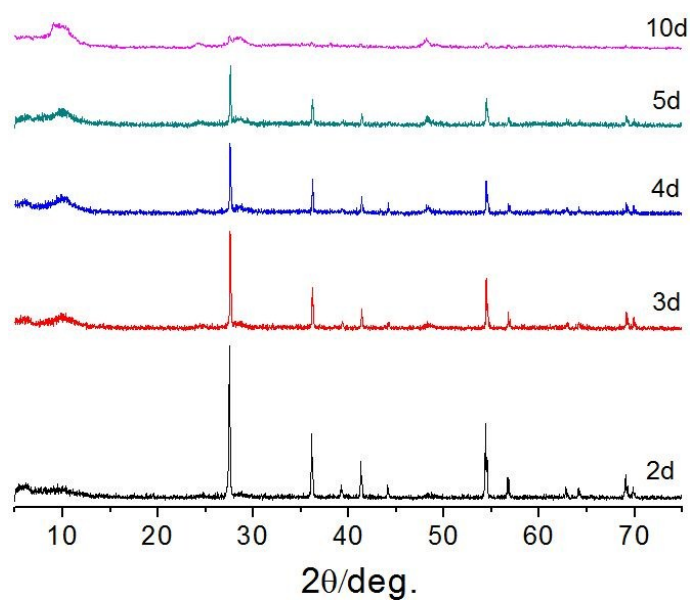

Figure S5 XRD patterns of hydrothermal products using P25-800-8 as the starting material at 130 °C for 2-10 days
